# Supplementary material for: DTX-P7, a peptide–drug conjugate, is highly effective for non-small cell lung cancer
Source: PubMed Central journal article supplement (PMC9164557; doi:10.1186/s13045-022-01274-8), 2022-06-03
Supplement: 13045_2022_1274_MOESM5_ESM.pdf [file 13045_2022_1274_MOESM5_ESM.pdf]

## *Supplemental Material*

### **DTX-P7, a peptide-drug conjugate, is highly effective for non-small cell lung cancer**

#### *P7 Targeting of A549/CD133<sup>+</sup> cells via Hsp90*

Cytotoxic agents that target killing rapidly proliferating cells are often difficult to produce good curative effects in the dormant or quiescent CSCs in tumor tissues (34, 35). As a member of the transmembrane glycoprotein family, CD133 (also known as AC133 and prominin-1) was originally used as a surface antigen specific to human hematopoietic stem cells (36). In our previous study, CD133 was identified as a biomarker of CSLCs in NSCLC as evidenced by the fact that CD133<sup>+</sup> cells isolated from A549 cells showed dramatic migration and invasion potential (37). A549/CD133<sup>+</sup> cells and A549 cells showed significant difference in growth morphology (supplemental Fig. S4a). Like most stem cells, A549/CD133<sup>+</sup> cells grew into non-adherent spheres, rather than monolayers of adherent cells. The presence of Hsp90 protein on the membrane of A549/CD133<sup>+</sup> cells was also confirmed by Western blotting and immunofluorescence staining (supplemental Fig. S4b-c). In addition, by using a fluorescein isothiocyanate (FITC)-labeled P7, we identified the binding potential of P7 to A549/CD133<sup>+</sup> cells while competition of A549/CD133<sup>+</sup> cells to FITC-P7 by pretreatment with excess unlabeled P7 further verified the potential use of P7 for treatments of A549/CD133<sup>+</sup> cells (supplemental Fig. S4d).

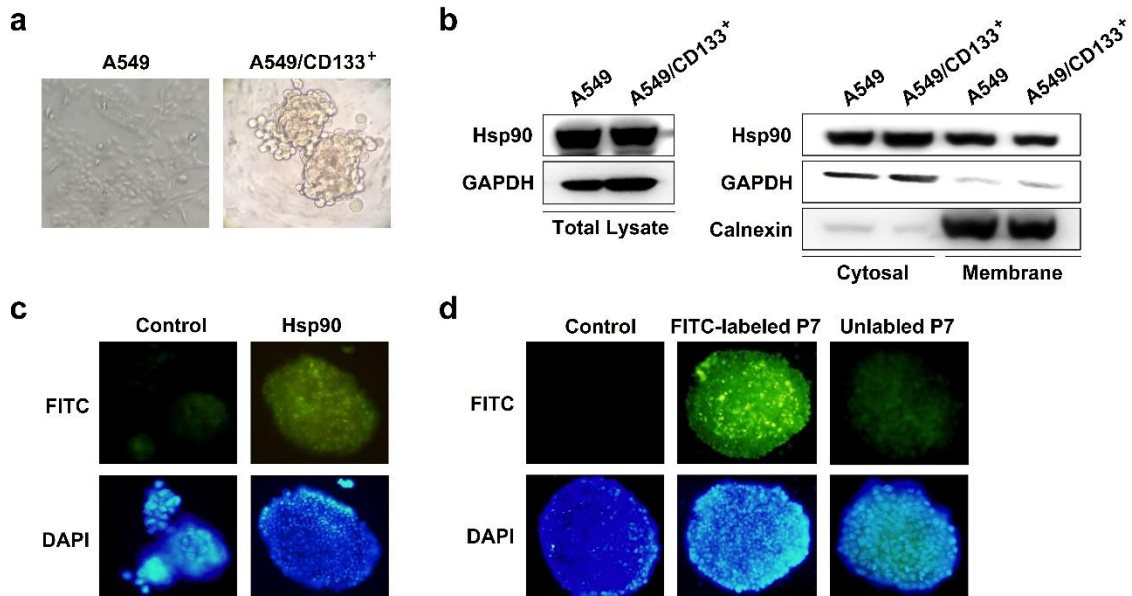

**Fig.S4. Cell growth morphology of cancer stem cell-like A549/CD133<sup>+</sup> cells and identification of cell surface Hsp90 in A549/CD133<sup>+</sup> cells.** **a)** Morphology of A549 and A549/CD133<sup>+</sup> cells. **b)** Hsp90 expression levels were assessed in A549/CD133<sup>+</sup> cells by cellular fractionation and Western blotting analysis. **c)** Immunofluorescence analysis of cell surface Hsp90 in A549/CD133<sup>+</sup> cells. **d)** Immunofluorescence assays of FITC-labeled P7 binding to A549/CD133<sup>+</sup> cells. Competition of P7 binding to A549/CD133<sup>+</sup> cells by excess free P7.
