# Supplementary material for: DTX-P7, a peptide–drug conjugate, is highly effective for non-small cell lung cancer
Source: PubMed Central journal article supplement (PMC9164557; doi:10.1186/s13045-022-01274-8), 2022-06-03
Supplement: 13045_2022_1274_MOESM6_ESM.pdf [file 13045_2022_1274_MOESM6_ESM.pdf]

## *Supplemental Material*

### **DTX-P7, a peptide-drug conjugate, is highly effective for non-small cell lung cancer**

#### *Effect of DTX-P7 on survival of A549/CD133<sup>+</sup> cells*

For this, we performed a cell viability assay when A549/CD133<sup>+</sup> cells were exposed to DTX-P7. As shown in supplemental Fig. S5a, DTX-P7 showed mild suppression on survival of A549/CD133<sup>+</sup> cells. Additionally, to determine the effects of DTX-P7 on cancer stem cell survival, A549/CD133<sup>+</sup> cells were stained with PKH26, a lipophilic dye which declines with every round of division and distinguishes rapidly and slowly proliferating cells by fluorescence intensity in cells (supplemental Fig. S5b). 10 days after PKH26 staining, A549/CD133<sup>+</sup> cells were divided into PKH<sup>low</sup> and PKH<sup>high</sup> populations based on dye retention (supplemental Fig. S5c). Following treatments with DTX-P7 or DTX for 72 h, both quiescent/slowly proliferating PKH<sup>high</sup> cells and fast proliferating PKH<sup>low</sup> cells were more sensitive to DTX-P7 than DTX (Fig. 2c in the main text).

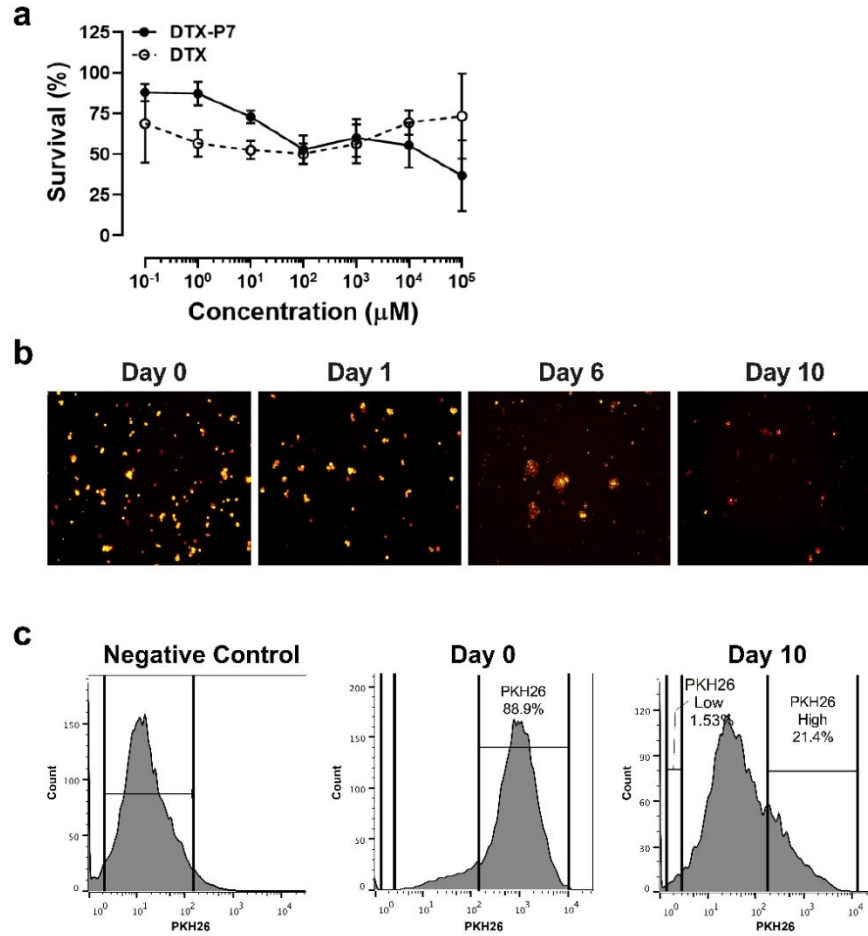

**Fig.S5. Effects of DTX-P7 on survival of A549/CD133<sup>+</sup> cells and PKH26 staining of A549/CD133<sup>+</sup> cells. a) Cell viability of DTX-P7 and DTX in A549/CD133<sup>+</sup> cells following 48-h treatment. b) A549/CD133<sup>+</sup> cells were stained by PKH26 followed by fluorescence detection at Day 0, 1, 6 and 10. c) Representative fluorescence-activated cell sorting profile of A549/CD133<sup>+</sup> cells selected for sorting 10 days after PKH26 staining as compared with those of the unstained control (negative control) and Day 0.**
